# Supplementary material for: NOR-SASS (Norwegian Sonothrombolysis in Acute Stroke Study): Randomized Controlled Contrast-Enhanced Sonothrombolysis in an Unselected Acute Ischemic Stroke Population
Source: PubMed Central journal article supplement — Stroke. 2017 Jan 23;48(2):335–41. doi: 10.1161/STROKEAHA.116.014644 (PMC5266415; doi:10.1161/strokeaha.116.014644), 2017-01-23
Supplement: str-48-335-s001.pdf [file str-48-335-s001.pdf]

## Acknowledgment Permission Form

Journal: STROKE

Manuscript No: 014644

First author ALIONA NACU

Title of work: The Norwegian Sonothrombolysis in Acute Stroke Study (NOR-SASS). Randomized controlled contrast enhanced sonothrombolysis

### Acknowledgment Permission:

Authors must provide written permission/approval from all individuals mentioned by name in the Acknowledgements section of a submitted manuscript. By signing this form, any and all acknowledged persons therefore state that they have read and approved the mention of their names in the Acknowledgment section of the aforementioned paper.

Printed Name: LINN ELIN RØDAL

Signature 

Date 

Printed Name: LEILA MARIE FRID

Signature 

Date 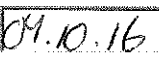

Printed Name: MAREN INSELSETH

Signature 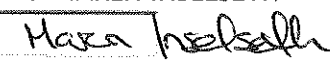

Date 

---
